# Supplementary material for: Depth-Dependent Environmental Drivers of Microbial Plankton Community Structure in the Northern Gulf of Mexico
Source: Front Microbiol. 2019 Jan 4;9:3175. doi: 10.3389/fmicb.2018.03175 (PMC6328475; doi:10.3389/fmicb.2018.03175)
Supplement: Supplementary file 12 [file Table_1.xlsx]

## Sheet: Supplemental_Table_1.csv
Supplemental Table 1: Sample metadata for each microbial plankton sample in DP01 and DP02 cruises.
SampleID	CTD#	LAT	LONG	DepthFeature	PelagicZone	Station	Depth (m)	Temperature (C)	Salinity (ppt)	chl.Fluor. (~ mg m^-3)	Oxygen (ml/l)	CDOM_aqt (~ m^-1)	Turbidity (~ m^-1)	Density (sigma t)	Total N (umol/L)	NO3 (umol/L)	NO2 (umol/L)	NH4 (umol/L)	TDN (umol/L)	TDP (umol/L)	SRP (umol/L)	DOC (umol/L)	N	Cruise
CTD_001M1	1	29.065	-88.036	ChlMax	Epipelagic	B001	50	22.96	36.39	0.89	4.52	0.24	NA	25.21									3	DP01
CTD_001M2	1	29.065	-88.036	DO min	Mesopelagic	B001	450	9.23	35.1	0.02	2.56	0.21	NA	29.21									2	DP01
CTD_001D	1	29.065	-88.036	Max Depth	Bathpelagic	B001	1000	5.3	34.92	0.02	3.74	0.24	NA	32.21									3	DP01
CTD_002S	2	28.853	-87.413	Surface	Surface	B175	35	24.802	36.437	0.053	4.784	0.189	NA	24.83									3	DP01
CTD_002M2	2	28.853	-87.413	DO min	Mesopelagic	B175	450	9.439	35.122	0.019	2.555	0.217	NA	29.194									3	DP01
CTD_002D	2	28.853	-87.413	Max Depth	Bathpelagic	B175	1000	5.149	34.93	0.019	3.846	0.239	NA	32.231									3	DP01
CTD_003M1	3	28.853	-87.413	ChlMax	Epipelagic	B175	75	22.193	36.687	0.388	4.356	0.234	NA	25.78									3	DP01
CTD_004S	4	28.925	-87.52	Surface	Surface	B252	30	22.707	36.338	0.439	4.324	0.243	NA	25.164									3	DP01
CTD_004M2	4	28.925	-87.52	DO min	Mesopelagic	B252	400	9.03	35.068	0.019	2.592	0.213	NA	28.995									3	DP01
CTD_004D	4	28.925	-87.52	Max Depth	Bathpelagic	B252	1200	4.515	34.955	0.019	4.373	0.244	NA	33.257									3	DP01
CTD_005M1	5	28.02	-87.51	ChlMax	Epipelagic	B287	95	21.303	36.474	0.338	4.722	0.226	NA	25.954									1	DP01
CTD_006M1	6	28.02	-87.51	ChlMax	Epipelagic	B287	95	21.402	36.455	0.304	4.87	0.224	NA	25.908									3	DP01
CTD_006M2	6	28.02	-87.51	DO min	Mesopelagic	B287	475	9.28	35.098	0.019	2.567	0.215	NA	29.311									3	DP01
CTD_006D	6	28.02	-87.51	Max Depth	Bathpelagic	B287	1600	4.294	34.968	0.019	4.613	0.247	NA	35.119									1	DP01
CTD_007M1	7	28.056	-88.065	ChlMax	Epipelagic	B082	65	22.471	36.403	0.153	4.816	0.24	NA	25.431									2	DP01
CTD_007M2	7	28.056	-88.065	DO min	Mesopelagic	B082	465	9.529	35.122	0.002	2.6	0.211	NA	29.246	0.34	0.27	0.07	0.49	6.05	0.81	0.11	13275	3	DP01
CTD_007D	7	28.056	-88.065	Max Depth	Bathpelagic	B082	1600	4.295	34.967	0.019	4.622	0.245	NA	35.118									3	DP01
CTD_008M1	8	28.16	-88.54	ChlMax	Epipelagic	B250	75	22.024	36.583	0.489	4.194	0.232	NA	25.739									3	DP01
CTD_008M2	8	28.16	-88.54	DO min	Mesopelagic	B250	450	9.709	35.152	0.019	2.578	0.209	NA	29.168	0.22	0.16	0.06	0.12	6.18	1.07	0.07	102.83	3	DP01
CTD_008D	8	28.16	-88.54	Max Depth	Bathpelagic	B250	1600	4.311	34.967	0.019	4.603	0.243	NA	35.123									3	DP01
CTD_009S	9	26.9667	-89	Surface	Surface	SW4	3.44	30.41	36.226	NA	4.752	0.027	0.344	22.559									3	DP02
CTD_009M2	9	26.9667	-89	DO min	Mesopelagic	SW4	600.52	10.259	35.118	NA	2.822	0.051	0.307	27.068	0.35	0.14	0.21	0.23	6.45	0.97	0.08	7064.17	3	DP02
CTD_009D	9	26.9667	-89	Max Depth	Bathypelagic	SW4	1466.45	4.322	34.8695	NA	4.865	0.066	0.303	27.716	0.3	0.22	0.08	0.44	6.44	0.97	0.13	856.25	3	DP02
CTD_010S	10	26.8827	-88.9988	Surface	Surface	SW4	3.49	30.03	36.164	0.052	4.745	0.027	0.358	22.648									3	DP02
CTD_010M1	10	26.8827	-88.9988	Chl max	Epipelagic	SW4	110.54	26.881	36.142	0.287	4.743	0.046	0.352	23.679	0.18	0.16	0.02	0.17	6.37	0.12	0.06	732.58	3	DP02
CTD_010M2	10	26.8827	-88.9988	DO min	Mesopelagic	SW4	650.52	9.128	34.967	0.052	2.828	0.05	0.311	27.139	0.28	0.16	0.12	0.21	7.97	1.84	0.13	16458.3	3	DP02
CTD_010D	10	26.8827	-88.9988	Max Depth	Bathypelagic	SW4	1499.38	4.315	34.87	0.052	4.874	0.065	0.304	27.717	0.1	0.02	0.08	0.2	9.27	0.73	0.05	1935.83	3	DP02
CTD_013M2	13	27.0328	-88.156	DO min	Mesopelagic	SE1	750.51	9.015	34.9695	0.052	2.745	0.05	0.316	27.16	0.08	0	0.08	0.09	5.94	0.9	0.06	92.25	3	DP02
CTD_013D	13	27.0328	-88.156	Max Depth	Bathypelagic	SE1	1500.46	4.565	34.8595	0.069	4.582	0.062	0.312	27.682	0.27	0.2	0.07	0.19	6.42	1	0.1	1655	3	DP02
CTD_014M2	14	27.5635	-87.5463	DO min	Mesopelagic	B286	660.53	9.2	34.9835	0.052	2.808	0.056	0.354	27.14	5.27	5.15	0.12	2.63	15.47	1.7	0.12	99.42	3	DP02
CTD_014D	14	27.5635	-87.5463	Max Depth	Bathypelagic	B286	1490.48	4.405	34.8685	0.069	4.754	0.07	0.346	27.706	0.15	0.1	0.05	0.09	5.62	0.69	0.05	1282.5	3	DP02
CTD_016S	16	28.1139	-87.4712	Surface	Surface	B287	1.41	30.1505	36.205	0.052	4.753	0.028	0.364	22.636	0.06	0.03	0.03	0.54	5.82	0.14	0.03	401.71	3	DP02
CTD_016M1	16	28.1139	-87.4712	Chl max	Epipelagic	B287	90.52	27.02	36.468	0.405	4.689	0.047	0.402	23.879	0.38	0.27	0.11	0.45	4.94	0.13	0.14	658.08	3	DP02
CTD_016M2	16	28.1139	-87.4712	DO min	Mesopelagic	B287	467.44	11.029	35.2505	0.052	2.701	0.052	0.332	27.033									3	DP02
CTD_016D	16	28.1139	-87.4712	Max Depth	Bathypelagic	B287	1506.42	4.347	34.873	0.069	4.826	0.064	0.322	27.715	0.23	0.19	0.04	0.21	5.03	0.5	0.13	2578.54	3	DP02
CTD_017S	17	28.4696	-87.4899	Surface	Surface	B252	4.42	30.912	31.7595	0.321	4.942	0.153	0.614	19.035	0.54	0.49	0.05	0.21	5.77	0.15	0.04	358	3	DP02
CTD_017M1	17	28.4696	-87.4899	Chl max	Epipelagic	B252	70.5	25.625	36.323	0.271	5.099	0.053	0.395	24.21	0.38	0.34	0.04	0.16	4.81	0.13	0.07	457.92	3	DP02
CTD_017M2	17	28.4696	-87.4899	DO min	Mesopelagic	B252	462.48	9.598	35.061	0.052	2.696	0.05	0.345	27.132									3	DP02
CTD_017D	17	28.4696	-87.4899	Max Depth	Bathypelagic	B252	1500.13	4.348	34.877	0.069	4.836	0.062	0.329	27.716	19.86	19.82	0.04	0.22	21.6	1.63	1.04	914.17	3	DP02
CTD_018S	18	29.0013	-87.4881	Surface	Surface	B175	2.06	30.467	29.6265	0.757	4.849	0.289	0.818	17.603									3	DP02
CTD_018M1	18	29.0013	-87.4881	Chl max	Epipelagic	B175	40.57	24.4195	36.4865	0.271	4.649	0.065	0.446	24.7									3	DP02
CTD_018D	18	29.0013	-87.4881	Max Depth	Bathypelagic	B175	1499.72	4.3155	34.8775	0.069	4.835	0.076	0.388	27.721	22.87	22.83	0.03	0.09	21.7	1.62	1.32	1521.67	3	DP02
CTD_019S	19	28.9271	-87.3969	Surface	Surface	B175	4.16	30.9395	34.31	0.388	4.909	0.135	0.658	20.917									3	DP02
CTD_019M2	19	28.9271	-87.3969	DO min	Mesopelagic	B175	399.53	10.201	35.1315	0.052	2.718	0.078	0.451	27.085	16.39	16.3	0.09	0.55	18.98	1.83	0.7	75.78	3	DP02
CTD_019D	19	28.9271	-87.3969	Max Depth	Bathypelagic	B175	1403.66	4.3335	34.8765	0.069	4.837	0.092	0.44	27.718	23.54	23.48	0.06	0.11	22.11	1.62	1.16	1475.42	3	DP02
CTD_020S	20	28.532	-87.024	Surface	Surface	B080	1.35	29.528	32.0185	0.455	4.851	0.157	0.707	19.703									3	DP02
CTD_020M1	20	28.532	-87.024	Chl max	Epipelagic	B080	73.4	21.627	36.5395	0.22	3.733	0.07	0.487	25.558									3	DP02
CTD_020M2	20	28.532	-87.024	DO min	Mesopelagic	B080	498.5	8.8445	34.9675	0.052	2.726	0.066	0.465	27.183									3	DP02
CTD_020D	20	28.532	-87.024	Max Depth	Mesopelagic	B080	800.81	6.0315	34.819	0.052	3.486	0.071	0.462	27.47									2	DP02
CTD_021M12	21	28.4922	-86.9745	Surface	Surface	B080	12.6	30.1325	35.756	0.422	4.89	0.07	0.597	22.353									3	DP02
CTD_021M1	21	28.4922	-86.9745	Chl max	Epipelagic	B080	43.54	24.865	36.2835	0.287	4.777	0.074	0.528	24.419									3	DP02
CTD_021M2	21	28.4922	-86.9745	DO min	Mesopelagic	B080	500.42	8.5845	34.9405	0.052	2.741	0.061	0.456	27.204									3	DP02
CTD_021D	21	28.4922	-86.9745	Max Depth	Mesopelagic	B080	800.46	6.0715	34.819	0.052	3.46	0.065	0.444	27.465									3	DP02
CTD_022S	22	27.9768	-86.9789	Surface	Surface	B003	1.3	29.2105	35.9955	0.103	4.772	0.035	0.5	22.798									2	DP02
CTD_022M1	22	27.9768	-86.9789	Chl max	Epipelagic	B003	72.57	26.2475	36.5215	0.556	4.568	0.053	0.509	24.162									3	DP02
CTD_022M2	22	27.9768	-86.9789	DO min	Mesopelagic	B003	457.27	10.197	35.1375	0.052	2.7	0.054	0.437	27.091									2	DP02
CTD_022D	22	27.9768	-86.9789	Max Depth	Bathypelagic	B003	1500.44	4.326	34.879	0.069	4.849	0.067	0.426	27.72	0.2	0.1	0.1	0.08	18.32	1.4	0.09	380.25	3	DP02
CTD_024S	24	27.4576	-86.9851	Surface	Surface	B079	1.38	29.543	36.2965	0.069	4.751	0.033	0.464	22.908									2	DP02
CTD_024M2	24	27.4576	-86.9851	Chl max	Epipelagic	B079	92.47	27.3025	36.385	0.287	4.693	0.045	0.477	23.72									2	DP02
CTD_024M1	24	27.4576	-86.9851	DO min	Mesopelagic	B079	600.51	9.1085	35.004	0.052	2.703	0.05	0.426	27.166									3	DP02
CTD_024D	24	27.4576	-86.9851	Max Depth	Bathypelagic	B079	1499.25	4.341	34.882	0.069	4.828	0.062	0.416	27.718	23.99	23.85	0.14	0.35	20.36	1.58	0.89	568.33	3	DP02
CTD_027D	27	27.0179	-87.0031	Max Depth	Bathypelagic	SE3	1499.83	4.347	34.882	0.069	4.819	0.061	0.428	27.717	0.27	0.22	0.05	0.18	7.75	0.78	0.12	194.25	3	DP02
CTD_028D	28	26.9609	-87.0019	Max Depth	Bathypelagic	SE3	1499.83	4.347	34.882	0.069	4.819	0.061	0.428	27.717	13.97	13.77	0.2	0.42	17.73	1.41	0.6	844.17	3	DP02
CTD_029D	29	27.515	-86.5536	Max Depth	Bathypelagic	B255	1496.36	4.332	34.8845	0.069	4.841	0.061	0.414	27.72	15.75	15.58	0.17	0.9	21.68	1.34	0.5	1711.67	3	DP02
CTD_030D	30	27.5266	-86.5076	Max Depth	Bathypelagic	B255	1500.71	4.345	34.884	0.069	4.83	0.059	0.414	27.718	11.95	11.85	0.1	1.85	21.37	0.95	0.12	737.25	1	DP02
